# Supplementary material for: Immune responses to stroke: mechanisms, modulation, and therapeutic potential
Source: JCI journal article supplement (doi:10.1172/jci135530), 2020-05-10
Supplement: sd1 [file 1]

## Supplemental Table

### Selected human trials and animal stroke studies using agents targeting the immune system

| Drug, Trial type                                          | Human trials                                     |                 |                          |                                                                                                                                                             | Animal Studies                 |                       |                      |                                                                                         |
|-----------------------------------------------------------|--------------------------------------------------|-----------------|--------------------------|-------------------------------------------------------------------------------------------------------------------------------------------------------------|--------------------------------|-----------------------|----------------------|-----------------------------------------------------------------------------------------|
|                                                           | Population, n (drug/ placebo or conventional tx) | Age             | Time of initial dose     | Outcomes, *comments (reference)                                                                                                                             | Model                          | Species and sex       | Time of initial dose | Outcomes, *comments (reference)                                                         |
| Anti CD11/CD18, Hu23F2G, Rovelizumab Phase III            | Ischemic stroke >400                             | ?               | ≤12 hours                | <b>Negative trial</b><br><br>*study not published, data from news article (1)                                                                               | Transient 2 hr proximal MCAO   | Male NZ rabbits       | 20 min               | smaller infarct (2)                                                                     |
|                                                           |                                                  |                 |                          |                                                                                                                                                             | MCAO with fibrin-rich clot     | Male Wistar Rats      | 2 hrs ± tPA          | <b>No benefit with or without tPA (3)</b>                                               |
|                                                           |                                                  |                 |                          |                                                                                                                                                             | MCAO with fibrin-rich clot     | Male Wistar Rats      | 4 hrs ± tPA          | <b>No benefit alone, but improved infarct size and function when given with tPA (3)</b> |
| anti-ICAM1 Enlimomab Phase II                             | Ischemic stroke 625(317/308)                     | 20-99           | ≤6 hrs then 5d           | <b>More infection worse mRS</b><br><br>*the murine antibody likely provoked an immune response (4)                                                          | Embolism                       | Rabbit, Not specified | 15 or 30 min         | <b>no benefit unless with tPA (5)</b>                                                   |
| UK-279,276 CD18 Antagonist Adaptive dose-response finding | Stroke 966(748/218)                              | 36-96 (mean 72) | ≤ 6hrs                   | <b>stopped for futility</b><br><br>*Well tolerated, did not alter change in SSS, (6)                                                                        | Permanent proximal MCAO        | Male Wistar rats      | 2 hrs                | <b>no benefit (7)</b>                                                                   |
|                                                           |                                                  |                 |                          |                                                                                                                                                             | Transient 2 hr proximal MCAO   | Male Wistar rats      | 4 hrs                | reduced infarct size, improved function (7)                                             |
| Anakinra, Interleukin-1 receptor antagonist Phase II      | Stroke 34(17/17)                                 | 61-77           | ≤6hrs, then for 72hrs IV | No adverse events, more 30d 0-1 mRS, more reduction from baseline NIHSS in patients with cortical infarcts only.<br><br>*Reduced peripheral inflammation(8) | Transient 70 min proximal MCAO | Male Wistar rats      | 3 then 6 hr dose     | smaller infarcts improved function (9)                                                  |
|                                                           |                                                  |                 |                          |                                                                                                                                                             | Transient 60 min proximal MCAO | Male Wistar rats      | 60 min               | <b>no difference in infarct size, improved recovery with 60 min (10)</b>                |
|                                                           |                                                  |                 |                          |                                                                                                                                                             | Transient 60 min proximal MCAO | Male Wistar rats      | 24 hrs               | <b>No benefit (10)</b>                                                                  |

| Drug, Trial type                                                 | Human trials                                           |         |                                      |                                                                                  | Animal Studies                        |                                                         |                                 |                                                                  |
|------------------------------------------------------------------|--------------------------------------------------------|---------|--------------------------------------|----------------------------------------------------------------------------------|---------------------------------------|---------------------------------------------------------|---------------------------------|------------------------------------------------------------------|
|                                                                  | Population, n (drug/ placebo or conventional tx)       | Age     | Time of initial dose                 | Outcomes, *comments (reference)                                                  | Model                                 | Species and sex                                         | Time of initial dose            | Outcomes, *comments (reference)                                  |
| Anakinra, Interleukin-1 receptor antagonist Phase II             | Ischemic stroke, most with tPA 80(39/41)               | Mean 72 | ≤5hrs, then bid for 3d sq            | no clinical benefit<br>*Reduced plasma IL-6, no change in CRP (11)               | Transient 90 min proximal MCAO        | Aged (15-16 month old) male lean and corpulent JCR rats | 3 hrs                           | Smaller 24hr infarct volume, fewer infiltrating neutrophils (12) |
|                                                                  |                                                        |         |                                      |                                                                                  | Transient 90 min proximal MCAO        | Aged (13 month old) male lean and corpulent JCR rats    | 3 hrs                           | smaller infarcts improved function (9)                           |
| Minocycline Open label/ evaluator blinded                        | Ischemic stroke 152(74/77)                             | Mean 67 | 6-24hrs, then 5 days (mean 12.6 hrs) | Better function on mRS, BI, NIHSS out to 90d (13)                                | Embolic focal stroke                  | Male Wistar rats, type I diabetic                       | 60 min                          | smaller infarcts (14)                                            |
|                                                                  |                                                        |         |                                      |                                                                                  | Transient 90 min proximal MCAO        | Male C57BL/6J mice                                      | 30 min                          | smaller infarcts and better function (15)                        |
|                                                                  |                                                        |         |                                      |                                                                                  | Transient 90 min proximal MCAO        | Ovariectomized female C57BL/6J mice                     | 30 min                          | no benefit (15)                                                  |
| Minocycline Open label/ evaluator blinded                        | Ischemic stroke 53 (26/27)                             | Mean 67 | 6-24hrs, then 5 days                 | Males with improved NIHSS vs. ASA, females no effect (16)                        | Transient 60 min embolic stroke       | Male SHR                                                | tPA 6 hrs, minocycline at 4 hrs | reduced infarct, less hemorrhagic conversion (17)                |
|                                                                  |                                                        |         |                                      |                                                                                  | Transient 90 min proximal MCAO        | Male SD rats                                            | 4 hrs                           | Reduced Infarct size (18)                                        |
| S1p inhibitor, FTY720, Fingolimod Open label / evaluator blinded | Ischemic stroke 22(11/11)                              | Mean 63 | Mean 20 hrs, then daily for 3d       | More reduction in NIHSS, more 0-1 90d mRS<br>*case-control. By infarct size (19) | Embolic stroke, reperfusion at 30 min | Male C57BL/6J mice                                      | 30 min                          | Improved infarct size and function (20)                          |
|                                                                  |                                                        |         |                                      |                                                                                  | Photothrombotic stroke                | Male C57BL/6J mice                                      | 3 days                          | Improved function (21)                                           |
| Fingolimod Open label                                            | ACA or MCA strokes 47(25 tPA alone/22 fingolimod +tPA) | Mean 60 | ≤ 4.5 hrs, then daily for 3d         | Less infarct growth, 0-1 90d mRS was better<br>*randomized by coin toss (22)     | Permanent distal MCAO                 | Male C57BL/6J mice                                      | 3 hrs                           | No benefit (23)                                                  |
|                                                                  |                                                        |         |                                      |                                                                                  | Transient 2 hr proximal MCAO          | male SD rats                                            | 2 hrs                           | decreased infarct, improved function (24)                        |

| Drug, Trial type                        | Human trials                                     |       |                      |                                                                                                                                                            | Animal Studies                 |                    |                      |                                                                   |
|-----------------------------------------|--------------------------------------------------|-------|----------------------|------------------------------------------------------------------------------------------------------------------------------------------------------------|--------------------------------|--------------------|----------------------|-------------------------------------------------------------------|
|                                         | Population, n (drug/ placebo or conventional tx) | Age   | Time of initial dose | Outcomes, *comments (reference)                                                                                                                            | Model                          | Species and sex    | Time of initial dose | Outcomes, *comments (reference)                                   |
| Anti-VLA-4 / CD49d Natalizumab Phase II | Ischemic stroke, 161(79/82)                      | 18-85 | ≤9 hrs once          | <b>Infarct growth not different</b> , more patients with mRS 0-1 at 30d<br><br>*follow-up Phase IIb trial at ≤24hr dosing was <b>negative</b> (unpub) (25) | Permanent distal MCAO          | Male C57BL/6J mice | 3 hrs                | infarct reduction, fewer leukocytes *multicenter preclinical (26) |
|                                         |                                                  |       |                      |                                                                                                                                                            | Transient 1 hr proximal MCAO   | Male C57BL/6J mice | 3 hrs                | <b>no benefit</b> *multicenter preclinical (26)                   |
|                                         |                                                  |       |                      |                                                                                                                                                            | Transient 3hr proximal MCAO    | Male Lewis Rats    | 2 hrs                | Infarct reduction, better function (27)                           |
|                                         |                                                  |       |                      |                                                                                                                                                            | Transient 30 min proximal MCAO | Male C57BL/6J mice | 3 hrs                | Infarct reduction, fewer leukocytes (28)                          |
|                                         |                                                  |       |                      |                                                                                                                                                            | Transient 30 min proximal MCAO | Male C57BL/6J mice | 3 hrs                | <b>No benefit</b> (29)                                            |

**Abbreviations:** CRP: C reactive protein; MCAO: Middle Cerebral Artery Occlusion; SSS: Scandinavian Stroke Scale; SD: Sprague-Dawley; SHR: Spontaneously hypertensive rat

**Legend:** Selected human and animal stroke studies. Human studies were eliminated for being un-controlled, animal studies eliminated if the dosing regimen was not clinically applicable or if the outcome wasn't stroke size or animal function. Control is either placebo or conventional therapy for all human studies. For rodent trials, times are for first dose, and size means infarct reduction, function means improvement on some functional score or task. If an animal study was negative it is in red.

### References

1. Becker KJ. Anti-leukocyte antibodies: LeukArrest (Hu23F2G) and Enlimomab (R6.5) in acute stroke. *Curr Med Res Opin.* 2002;18 Suppl 2:s18-22.
2. Yenari MA, Kunis D, Sun GH, Onley D, Watson L, Turner S, et al. Hu23F2G, an antibody recognizing the leukocyte CD 11/CD 18 integrin, reduces injury in a rabbit model of transient focal cerebral ischemia. *Exp Neurol.* 1998;153:223-33.
3. Zhang RL, Zhang ZG, and Chopp M. Increased therapeutic efficacy with rt-PA and anti-CD18 antibody treatment of stroke in the rat. *Neurology.* 1999;52(2):273-9.
4. Sherman D, Bes A, Easton JD, Hacke W, Kaste M, Polmar SH, et al. Use of anti-ICAM-1 therapy in ischemic stroke: Results of the enlimomab acute stroke trial. *Neurology.* 2001;57:1428-34.

5. Bowes MP, Rothlein R, Fagan SC, and Zivin JA. Monoclonal antibodies preventing leukocyte activation reduce experimental neurologic injury and enhance efficacy of thrombolytic therapy. *Neurology*. 1995;45:815-9.
6. Krams M, Lees KR, Hacke W, Grieve AP, Orgogozo JM, and Ford GA. Acute Stroke Therapy by Inhibition of Neutrophils (ASTIN): An Adaptive Dose-Response Study of UK-279,276 in Acute Ischemic Stroke. *Stroke*. 2003;34:2543-8.
7. Jiang N, Chopp M, and Chahwala S. Neutrophil inhibitory factor treatment of focal cerebral ischemia in the rat. *Brain Res*. 1998;788:25-34.
8. Emsley HCA, Smith CJ, Georgiou RF, Vail A, Hopkins SJ, Rothwell NJ, et al. A randomised phase II study of interleukin-1 receptor antagonist in acute stroke patients. *Journal of Neurology, Neurosurgery and Psychiatry*. 2005;76:1366-72.
9. Pradillo JM, Murray KN, Coutts GA, Moraga A, Oroz-Gonjar F, Boutin H, et al. Reparative effects of interleukin-1 receptor antagonist in young and aged/co-morbid rodents after cerebral ischemia. *Brain, Behavior, and Immunity*. 2017;61:117-26.
10. Girard S, Murray KN, Rothwell NJ, Metz GAS, and Allan SM. Long-term functional recovery and compensation after cerebral ischemia in rats. *Behavioural Brain Research*. 2014;270:18-28.
11. Smith CJ, Hulme S, Vail A, Heal C, Parry-Jones AR, Scarth S, et al. SCIL-STROKE (subcutaneous interleukin-1 receptor antagonist in ischemic stroke): A randomized controlled phase 2 trial. *Stroke*. 2018;49:1210-6.
12. Pradillo JM, Denes A, Greenhalgh AD, Boutin H, Drake C, McColl BW, et al. Delayed administration of interleukin-1 receptor antagonist reduces ischemic brain damage and inflammation in comorbid rats. *Journal of Cerebral Blood Flow and Metabolism*. 2012;32:1810-9.
13. Goldstein LB. Minocycline treatment in acute stroke. *Current atherosclerosis reports*. 2008;10:286-7.
14. Liu Z, Fan Y, Won SJ, Neumann M, Hu D, Zhou L, et al. Chronic treatment with minocycline preserves adult new neurons and reduces functional impairment after focal cerebral ischemia. *Stroke*. 2007;38:146-52.
15. Li J, and McCullough LD. Sex differences in minocycline-induced neuroprotection after experimental stroke. *Journal of Cerebral Blood Flow and Metabolism*. 2009;29:670-4.
16. Amiri-Nikpour MR, Nazarbaghi S, Hamdi-Holasou M, and Rezaei Y. An open-label evaluator-blinded clinical study of minocycline neuroprotection in ischemic stroke: Gender-dependent effect. *Acta Neurologica Scandinavica*. 2015;131:45-50.
17. Murata Y, Rosell A, Scannevin RH, Rhodes KJ, Wang X, and Lo EH. Extension of the thrombolytic time window with minocycline in experimental stroke. *Stroke*. 2008;39:3372-7.
18. Yrjänheikki J, Tikka T, Keinänen R, Goldsteins G, Chan PH, and Koistinaho J. A tetracycline derivative, minocycline, reduces inflammation and protects against focal cerebral ischemia with a wide therapeutic window. *Proc Natl Acad Sci USA*. 1999;96:13496-500.
19. Fu Y, Zhang N, Ren L, Yan Y, Sun N, Li Y-J, et al. Impact of an immune modulator fingolimod on acute ischemic stroke. *Proceedings of the National Academy of Sciences*. 2014;111:18315-20.
20. Campos F, Qin T, Castillo J, Seo JH, Arai K, Lo EH, et al. Fingolimod reduces hemorrhagic transformation associated with delayed tissue plasminogen activator treatment in a mouse thromboembolic model. *Stroke*. 2013;44(2):505-11.

21. Brunkhorst R, Kanaan N, Koch A, Ferreiros N, Mirceska A, Zeiner P, et al. FTY720 treatment in the convalescence period improves functional recovery and reduces reactive astrogliosis in photothrombotic stroke. *PLoS ONE*. 2013;8(7):e70124.
22. Zhu Z, Fu Y, Tian D, Sun N, Han W, Chang G, et al. Combination of the Immune Modulator Fingolimod with Alteplase in Acute Ischemic Stroke: A Pilot Trial. *Circulation*. 2015;132:1104-12.
23. Liesz A, Sun L, Zhou W, Schwarting S, Mracsko E, Zorn M, et al. FTY720 reduces post-ischemic brain lymphocyte influx but does not improve outcome in permanent murine cerebral ischemia. *PLoS ONE*. 2011;6(6):e21312.
24. Hasegawa Y, Suzuki H, Sozen T, Rolland W, and Zhang JH. Activation of sphingosine 1-phosphate receptor-1 by FTY720 is neuroprotective after ischemic stroke in rats. *Stroke*. 2010;41:368-74.
25. Elkins J, Velkamp R, Montaner J, Johnston SC, Singhal AB, Becker K, et al. Safety and efficacy of natalizumab in patients with acute ischaemic stroke (ACTION): a randomised, placebo-controlled, double-blind phase 2 trial. *The Lancet Neurology*. 2017;16:217-26.
26. Llovera G, Hofmann K, Roth S, Salas-Pérdomo A, Ferrer-Ferrer M, Perego C, et al. Results of a preclinical randomized controlled multicenter trial (pRCT): Anti-CD49d treatment for acute brain ischemia. *Science Translational Medicine*. 2015;7.
27. Becker K, Kindrick D, Relton J, Harlan J, and Winn R. Antibody to the  $\alpha 4$  Integrin Decreases Infarct Size in Transient Focal Cerebral Ischemia in Rats. *Stroke*. 2001;32:206-11.
28. Liesz A, Zhou W, Mracskó É, Karcher S, Bauer H, Schwarting S, et al. Inhibition of lymphocyte trafficking shields the brain against deleterious neuroinflammation after stroke. *Brain*. 2011;134:704-20.
29. Langhauser F, Kraft P, Göb E, Leinweber J, Schuhmann MK, Lorenz K, et al. Blocking of  $\alpha 4$  integrin does not protect from acute ischemic stroke in mice. *Stroke*. 2014;45:1799-806.
